# Supplementary material for: Complete Genome Sequence and Genomic Characterization of Lactobacillus acidophilus LA1 (11869BP)
Source: PubMed Central journal article supplement (PMC5809850; doi:10.3389/fphar.2018.00083), 2018-02-08
Supplement: DataSheet1.pdf [file DataSheet1.pdf]

1 **Supplementary materials for "Complete genome sequence and genomic characterization of**  
2 ***Lactobacillus acidophilus* LA1 (11869BP)"**

3

4 Supplementary fig. S1. Classification of genes by COG.

5 Supplementary table S1. Summary of the complete genomes in *Lactobacillus acidophilus* group

6 Supplementary table S2. Classification of genes by COG codes

7 Supplementary table S3. Similarity values between genomes

8 Supplementary table S4. Top 20 clusters of pan-genomic clustering result of *Lactobacillus*  
9 *acidophilus* group

10 Supplementary table S5. Number of genes associated with five CAZymes gene families

11 Supplementary table S6. Summary of bacteriocin in the genomes of *L. acidophilus* group

12 Supplementary table S7. Phage sequences found in the *L. acidophilus* genomes

13 Supplementary table S8. Detailed structure of the prophage ORFs inserted to the *L. acidophilus*  
14 genomes

15 Supplementary fig. S1. Classification of genes by COG. *L. acidophilus* strains LA1, NCFM, La-14, and FSI4 are marked with circles. *L. gallinarum*  
16 and *L. helveticus* are marked with triangles. All other genomes are marked with diamonds.

17

18

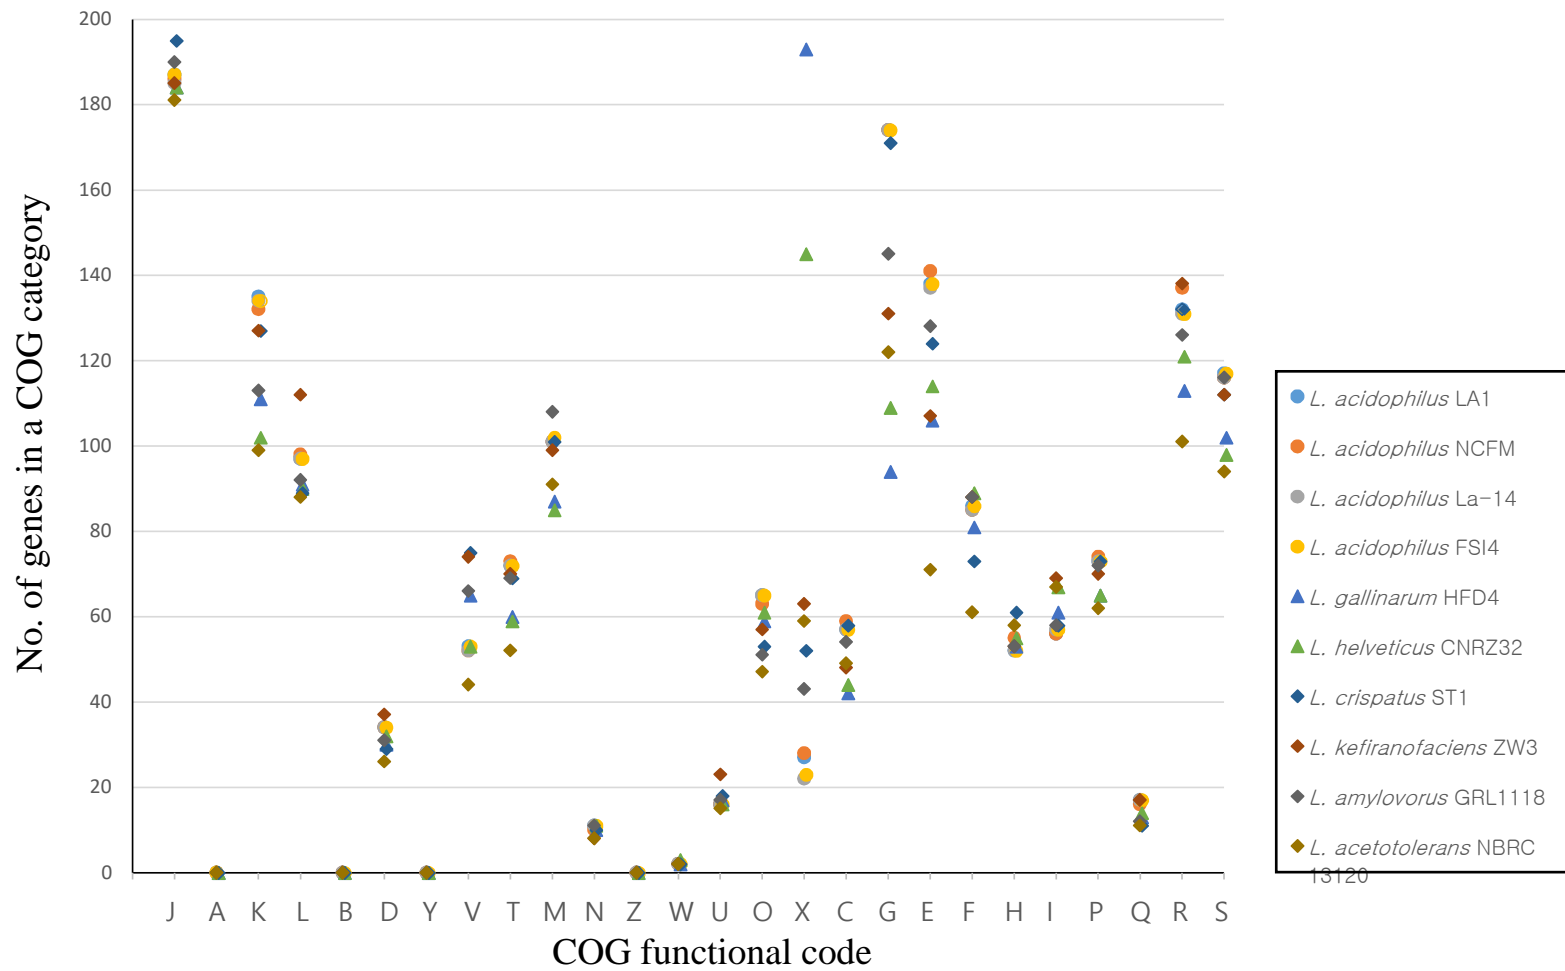

19 Supplementary table S1. Summary of the complete genomes in *Lactobacillus acidophilus* group.

| Genome                             |                                                                                             |                        |                 |        |                | Annotation |        |      |                    |       |        |        |         |  |
|------------------------------------|---------------------------------------------------------------------------------------------|------------------------|-----------------|--------|----------------|------------|--------|------|--------------------|-------|--------|--------|---------|--|
| Full name                          | Accession                                                                                   | Sequence               | Total size (bp) | GC (%) | Assembly level | Genes      | Coding | RNAs | rRNAs (5S,16S,23S) | tRNAs | ncRNAs | Pseudo | CRISPRs |  |
| <i>L. acidophilus</i> LA1          | CP017062                                                                                    | 1 chrom                | 1,991,195       | 34.7   | Complete       | 1,953      | 1,844  | 76   | 4, 4, 4            | 61    | 3      | 33     | 1       |  |
| <i>L. acidophilus</i> NCFM         | NC_006814                                                                                   | 1 chrom                | 1,993,560       | 34.7   | Complete       | 1,927      | 1,832  | 74   | 4, 4, 5            | 61    | 0      | 0      | 1       |  |
| <i>L. acidophilus</i> La-14        | NC_021181                                                                                   | 1 chrom                | 1,991,579       | 34.7   | Complete       | 1,948      | 1,835  | 73   | 4, 4, 4            | 61    | 0      | 40     | 1       |  |
| <i>L. acidophilus</i> FSI4         | NZ_CP010432                                                                                 | 1 chrom                | 1,991,969       | 34.7   | Complete       | 1,948      | 1,845  | 73   | 4, 4, 4            | 61    | 0      | 30     | 1       |  |
| <i>L. gallinarum</i> HFD4          | NZ_CP012890,<br>NZ_CP012891,<br>NZ_CP012892,<br>NZ_CP012893,<br>NZ_CP012895,<br>NZ_CP012896 | 1 chrom,<br>5 plasmids | 2,374,782       | 36.8   | Complete       | 2,410      | 1,950  | 82   | 5, 5, 5            | 64    | 3      | 378    | 1       |  |
| <i>L. helveticus</i> CNRZ32        | NC_021744                                                                                   | 1 chrom                | 2,225,962       | 36.9   | Complete       | 2,273      | 1,913  | 75   | 4, 4, 4            | 63    | 0      | 285    | 0       |  |
| <i>L. crispatus</i> ST1            | NC_014106                                                                                   | 1 chrom                | 2,043,161       | 36.9   | Complete       | 2,011      | 1,840  | 76   | 4, 4, 4            | 64    | 0      | 95     | 3       |  |
| <i>L. kefiranofaciens</i> ZW3      | NC_015602                                                                                   | 1 chrom                | 2,113,023       | 37.7   | Complete       | 2,067      | 1,787  | 72   | 4, 4, 4            | 60    | 0      | 208    | 1       |  |
| <i>L. amylovorus</i> GRL1118       | NC_017470,<br>NC_017471,<br>NC_017472                                                       | 1 chrom,<br>2 plasmids | 1,977,087       | 38.0   | Complete       | 1,975      | 1,815  | 74   | 4, 4, 4            | 62    | 0      | 86     | 3       |  |
| <i>L. Acetotolerans</i> NBRC_13120 | NZ_AP014808                                                                                 | 1 chrom                | 1,704,859       | 36.7   | Complete       | 1,669      | 1,492  | 75   | 4, 4, 4            | 60    | 3      | 102    | 0       |  |

21 Supplementary table S2. Classification of genes by COG codes. CODE indicates 26 COG functional categories and a not assigned ('-') category.

22 The description of each code was placed the right-side of the table. The genome names were abbreviated to their strain names.

| CODE | LA1 | NCFM | La-14 | FSI4 | HFD4 | CNRZ32 | ST1 | ZW3 | GRL1118 | NBRC 13120 | Description                                                   |
|------|-----|------|-------|------|------|--------|-----|-----|---------|------------|---------------------------------------------------------------|
| J    | 187 | 186  | 185   | 187  | 184  | 184    | 195 | 185 | 190     | 181        | Translation, ribosomal structure and biogenesis               |
| A    | 0   | 0    | 0     | 0    | 0    | 0      | 0   | 0   | 0       | 0          | RNA processing and modification                               |
| K    | 135 | 132  | 134   | 134  | 111  | 102    | 127 | 127 | 113     | 99         | Transcription                                                 |
| L    | 97  | 98   | 97    | 97   | 91   | 90     | 89  | 112 | 92      | 88         | Replication, recombination and repair                         |
| B    | 0   | 0    | 0     | 0    | 0    | 0      | 0   | 0   | 0       | 0          | Chromatin structure and dynamics                              |
| D    | 34  | 34   | 34    | 34   | 30   | 32     | 29  | 37  | 31      | 26         | Cell cycle control, cell division, chromosome partitioning    |
| Y    | 0   | 0    | 0     | 0    | 0    | 0      | 0   | 0   | 0       | 0          | Nuclear structure                                             |
| V    | 53  | 52   | 52    | 53   | 65   | 53     | 75  | 74  | 66      | 44         | Defense mechanisms                                            |
| T    | 72  | 73   | 72    | 72   | 60   | 59     | 69  | 70  | 69      | 52         | Signal transduction mechanisms                                |
| M    | 101 | 101  | 101   | 102  | 87   | 85     | 101 | 99  | 108     | 91         | Cell wall/membrane/envelope biogenesis                        |
| N    | 11  | 10   | 11    | 11   | 10   | 11     | 10  | 8   | 11      | 8          | Cell motility                                                 |
| Z    | 0   | 0    | 0     | 0    | 0    | 0      | 0   | 0   | 0       | 0          | Cytoskeleton                                                  |
| W    | 2   | 2    | 2     | 2    | 2    | 3      | 2   | 2   | 2       | 2          | Extracellular structures                                      |
| U    | 16  | 16   | 16    | 16   | 17   | 16     | 18  | 23  | 17      | 15         | Intracellular trafficking, secretion, and vesicular transport |
| O    | 65  | 63   | 65    | 65   | 59   | 61     | 53  | 57  | 51      | 47         | Posttranslational modification, protein turnover, chaperones  |
| X    | 27  | 28   | 22    | 23   | 193  | 145    | 52  | 63  | 43      | 59         | Mobilome: prophages, transposons                              |
| C    | 57  | 59   | 57    | 57   | 42   | 44     | 58  | 48  | 54      | 49         | Energy production and conversion                              |
| G    | 174 | 174  | 174   | 174  | 94   | 109    | 171 | 131 | 145     | 122        | Carbohydrate transport and metabolism                         |
| E    | 138 | 141  | 137   | 138  | 106  | 114    | 124 | 107 | 128     | 71         | Amino acid transport and metabolism                           |
| F    | 86  | 85   | 85    | 86   | 81   | 89     | 73  | 88  | 88      | 61         | Nucleotide transport and metabolism                           |
| H    | 52  | 55   | 52    | 52   | 53   | 55     | 61  | 53  | 53      | 58         | Coenzyme transport and metabolism                             |
| I    | 56  | 56   | 57    | 57   | 61   | 67     | 58  | 69  | 58      | 67         | Lipid transport and metabolism                                |
| P    | 73  | 74   | 73    | 73   | 65   | 65     | 73  | 70  | 72      | 62         | Inorganic ion transport and metabolism                        |
| Q    | 17  | 16   | 17    | 17   | 13   | 14     | 11  | 17  | 12      | 11         | Secondary metabolites biosynthesis, transport and catabolism  |
| R    | 132 | 137  | 131   | 131  | 113  | 121    | 132 | 138 | 126     | 101        | General function prediction only                              |
| S    | 117 | 116  | 116   | 117  | 102  | 98     | 112 | 112 | 116     | 94         | Function unknown                                              |
| -    | 291 | 278  | 292   | 292  | 332  | 332    | 286 | 423 | 304     | 171        | Not assigned                                                  |

24 Supplementary table S3. Similarity values between genomes. The values in lower right  
 25 triangle indicate pairwise similarities of average nucleotide identities (ANIs) and the values in  
 26 upper left triangle indicate pairwise similarity of 16S rRNA genes.

|                                    | LA1     | NCFM    | La-14   | FSI4    | HFD4    | CNRZ32  | ST1     | ZW3     | GRL1118 | NBRC_13120 |
|------------------------------------|---------|---------|---------|---------|---------|---------|---------|---------|---------|------------|
| <i>L. acidophilus</i> LA1          |         | 100     | 100     | 100     | 98.3450 | 98.4087 | 98.4723 | 97.2629 | 98.3450 | 94.0166    |
| <i>L. acidophilus</i> NCFM         | 99.9894 |         | 100     | 100     | 98.3450 | 98.4087 | 98.4723 | 97.2629 | 98.3450 | 94.0166    |
| <i>L. acidophilus</i> La-14        | 99.9924 | 99.9855 |         | 100     | 98.3450 | 98.4087 | 98.4723 | 97.2629 | 98.3450 | 94.0166    |
| <i>L. acidophilus</i> FSI4         | 99.9951 | 99.9854 | 99.9921 |         | 98.3450 | 98.4087 | 98.4723 | 97.2629 | 98.3450 | 94.0166    |
| <i>L. gallinarum</i> HFD4          | 80.7025 | 80.7737 | 80.6827 | 80.6082 |         | 99.1725 | 98.2813 | 97.0083 | 98.0267 | 94.3348    |
| <i>L. helveticus</i> CNRZ32        | 80.6914 | 80.6734 | 80.5434 | 80.5867 | 97.2932 |         | 98.4723 | 97.0719 | 98.0904 | 94.2712    |
| <i>L. crispatus</i> ST1            | 79.9150 | 79.8429 | 79.9097 | 79.8981 | 80.2848 | 80.2904 |         | 97.8358 | 98.8542 | 94.3348    |
| <i>L. kefiranofaciens</i> ZW3      | 79.2413 | 79.2668 | 79.2930 | 79.3827 | 82.7279 | 82.6864 | 79.7087 |         | 97.5812 | 93.5710    |
| <i>L. amylovorus</i> GRL1118       | 81.7273 | 81.7232 | 81.8051 | 81.7506 | 81.2886 | 81.5137 | 80.2846 | 79.9894 |         | 94.3985    |
| <i>L. acetotolerans</i> NBRC_13120 | 74.9473 | 74.9667 | 74.9196 | 75.1009 | 75.6046 | 75.4919 | 74.9250 | 75.4821 | 75.0343 |            |

27

28

29

30 Supplementary table S4. Top 20 clusters of pan-genomic clustering result of *Lactobacillus acidophilus* group. Cluster name is derived from the  
 31 description of gene clusters which were generated by get\_homologues. Cluster size is the sum of genes associated with the cluster. This table  
 32 shows the top 20 clusters among the LA1 gene clusters.

| Cluster name                | Cluster size | LA1 | NCFM | La-14 | FSI4 | HFD4 | CNRZ32 | ST1 | ZW3 | GRL1118 | NBRC 13120 |
|-----------------------------|--------------|-----|------|-------|------|------|--------|-----|-----|---------|------------|
| 5586_integrase              | 45           | 6   | 6    | 5     | 6    | 2    | 4      | 0   | 4   | 1       | 11         |
| 6517_acetate_kinase         | 30           | 4   | 4    | 4     | 4    | 2    | 2      | 3   | 3   | 3       | 1          |
| 360_transposase             | 22           | 4   | 3    | 3     | 4    | 0    | 0      | 1   | 2   | 5       | 0          |
| 5832_ATP-dependent_Clp_pr.. | 30           | 3   | 3    | 3     | 3    | 3    | 3      | 3   | 3   | 3       | 3          |
| 7004_guanine_permease       | 25           | 3   | 2    | 2     | 3    | 1    | 3      | 3   | 3   | 3       | 2          |
| 6723_calcium-translocatin.. | 22           | 3   | 3    | 3     | 3    | 2    | 1      | 3   | 1   | 2       | 1          |
| 6133_peptide_ABC_transpor.. | 22           | 3   | 3    | 3     | 3    | 2    | 3      | 2   | 0   | 2       | 1          |
| 6888_sugar_ABC_transporte.. | 20           | 3   | 3    | 3     | 3    | 0    | 1      | 3   | 1   | 2       | 1          |
| 957_mucus-binding_protei..  | 12           | 3   | 3    | 3     | 3    | 0    | 0      | 0   | 0   | 0       | 0          |
| 73_transposase              | 27           | 2   | 2    | 1     | 2    | 2    | 12     | 4   | 0   | 2       | 0          |
| 5529_gyrB                   | 20           | 2   | 2    | 2     | 2    | 2    | 2      | 2   | 2   | 2       | 2          |
| 5690_peptidase_M13          | 20           | 2   | 2    | 2     | 2    | 3    | 3      | 2   | 1   | 2       | 1          |
| 5727_aminopeptidase         | 19           | 2   | 2    | 2     | 2    | 2    | 2      | 2   | 2   | 2       | 1          |
| 5973_glycerol_phosphate_1.. | 18           | 2   | 2    | 2     | 2    | 1    | 1      | 2   | 2   | 2       | 2          |
| 116_transcriptional_regu..  | 17           | 2   | 2    | 2     | 2    | 2    | 1      | 3   | 1   | 2       | 0          |
| 6327_formate--tetrahydrof.. | 17           | 2   | 2    | 2     | 2    | 2    | 2      | 0   | 2   | 2       | 1          |
| 181_peptide_ABC_transpor..  | 16           | 2   | 2    | 2     | 2    | 0    | 2      | 2   | 2   | 2       | 0          |
| 6686_MFS_transporter        | 16           | 2   | 2    | 2     | 2    | 1    | 1      | 2   | 1   | 2       | 1          |
| 6620_oleate_hydratase       | 16           | 2   | 2    | 2     | 2    | 0    | 1      | 2   | 2   | 2       | 1          |
| 803_aspartate_kinase        | 16           | 2   | 2    | 2     | 2    | 2    | 1      | 2   | 2   | 1       | 0          |

33

34 **Supplementary table S5. Number of genes associated with five CAZymes gene families.**

|                                        | <b>LA1</b> | <b>NCFM</b> | <b>La-14</b> | <b>FSI4</b> | <b>HFD4</b> | <b>CNRZ32</b> | <b>ST1</b> | <b>ZW3</b> | <b>GRL1118</b> | <b>NBRC<br/>13120</b> |
|----------------------------------------|------------|-------------|--------------|-------------|-------------|---------------|------------|------------|----------------|-----------------------|
| glycoside hydrolases (GHs)             | 148        | 149         | 143          | 144         | 139         | 151           | 152        | 128        | 129            | 109                   |
| glycosyl transferases (GTs)            | 130        | 129         | 130          | 130         | 106         | 111           | 127        | 118        | 136            | 98                    |
| carbohydrate esterases (CEs)           | 25         | 25          | 25           | 25          | 27          | 29            | 26         | 34         | 27             | 24                    |
| auxiliary activities (AAs)             | 11         | 12          | 11           | 11          | 13          | 9             | 12         | 15         | 10             | 11                    |
| carbohydrate-binding modules<br>(CBMs) | 30         | 28          | 30           | 30          | 22          | 22            | 29         | 24         | 27             | 24                    |

35

36

37

38 Supplementary Table S6. Summary of bacteriocin in the genomes of *L. acidophilus* group.

| Strain                             | Area Of Interest | Class      | Identified on the basis of | BAGEL3 prediction             | AOI start position | Relative position                       |
|------------------------------------|------------------|------------|----------------------------|-------------------------------|--------------------|-----------------------------------------|
| <i>L. acidophilus</i> LA1          | AOI_1            | >10kd      | Blast_bacteriocinIII       | Enterolysin A                 | 1160238            | 10000-10665                             |
|                                    | AOI_2            | >10kd      | Blast_bacteriocinIII       | Helveticin J                  | 1548041            | 10000-10977                             |
|                                    | AOI_3            | Unmodified | Blast_bacteriocinII        | Acidocin J                    | 1806351            | 10000-10251                             |
| <i>L. acidophilus</i> NCFM         | AOI_1            | >10kd      | Blast_bacteriocinIII       | Enterolysin A                 | 1160302            | 10000-10665                             |
|                                    | AOI_2            | >10kd      | Blast_bacteriocinIII       | Helveticin J                  | 1548847            | 10000-10977                             |
|                                    | AOI_3            | Unmodified | Blast_bacteriocinII        | Acidocin J                    | 1803125            | 15587-15838                             |
| <i>L. acidophilus</i> La-14        | AOI_1            | >10kd      | Blast_bacteriocinIII       | Enterolysin A                 | 1159879            | 10000-10665                             |
|                                    | AOI_2            | >10kd      | Blast_bacteriocinIII       | Helveticin J                  | 1548422            | 10000-10977                             |
|                                    | AOI_3            | Unmodified | Blast_bacteriocinII        | Acidocin J                    | 1806732            | 10000-10251                             |
| <i>L. acidophilus</i> FSI4         | AOI_1            | >10kd      | Blast_bacteriocinIII       | Enterolysin A                 | 1160590            | 10000-10665                             |
|                                    | AOI_2            | >10kd      | Blast_bacteriocinIII       | Helveticin J                  | 1549126            | 10000-10977                             |
|                                    | AOI_3            | Unmodified | Blast_bacteriocinII        | Acidocin J                    | 1807429            | 10000-10251                             |
| <i>L. gallinarum</i> HFD4          | AOI_1            | >10kd      | Blast_bacteriocinIII       | Helveticin J                  | 282412             | 10000-10965                             |
|                                    | AOI_2            | >10kd      | Blast_bacteriocinIII       | Helveticin J<br>Enterolysin A | 1831721            | 17354-18301<br>10000-10656              |
|                                    | AOI_3            | >10kd      | Blast_bacteriocinIII       | Enterolysin A                 | 1856564            | 10000-10164<br>11815-12069              |
|                                    | AOI_4            | >10kd      | Blast_bacteriocinIII       | Helveticin J                  | 2276176            | 11501-11851<br>8299-8628<br>10000-10179 |
| <i>L. helveticus</i> CNRZ32        | AOI_1            | >10kd      | Blast_bacteriocinIII       | Enterolysin A                 | 1373925            | 10000-10656                             |
|                                    | AOI_2            | >10kd      | Blast_bacteriocinIII       | Helveticin J                  | 1772120            | 10000-10977                             |
|                                    | AOI_3            | >10kd      | Blast_bacteriocinIII       | Helveticin J                  | 2079607            | 10000-10965                             |
| <i>L. crispatus</i> ST1            | AOI_1            | >10kd      | Blast_bacteriocinIII       | Helveticin J                  | 682                | 10000-10878                             |
|                                    | AOI_2            | >10kd      | Blast_bacteriocinIII       | Enterolysin A                 | 1186707            | 10000-10674                             |
|                                    | AOI_3            | >10kd      | Blast_bacteriocinIII       | Enterolysin A                 | 1218163            | 10000-10623                             |
|                                    | AOI_4            | >10kd      | Blast_bacteriocinIII       | Helveticin J                  | 1534811            | 10000-10980                             |
|                                    | AOI_5            | Unmodified | Blast_bacteriocinII        | Putative bacteriocin          | 1617600            | 10000-10638                             |
| <i>L. kefiranofaciens</i> ZW3      | AOI_1            | >10kd      | Blast_bacteriocinIII       | Helveticin J                  | 237929             | 10000-10977                             |
|                                    | AOI_2            | >10kd      | Blast_bacteriocinIII       | Enterolysin A                 | 504364             | 10000-10446                             |
| <i>L. amylovorus</i> GRL1118       | AOI_1            | >10kd      | Blast_bacteriocinIII       | Helveticin J                  | 67942              | 14579-15517<br>10000-11028              |
|                                    | AOI_2            | >10kd      | Blast_bacteriocinIII       | Helveticin J                  | 362073             | 10000-11052                             |
|                                    | AOI_3            | >10kd      | Blast_bacteriocinIII       | Enterolysin A                 | 1179529            | 10000-10668                             |
|                                    | AOI_4            | >10kd      | Blast_bacteriocinIII       | Helveticin J                  | 1529453            | 10000-10977                             |
| <i>L. acetotolerans</i> NBRC_13120 | AOI_1            | >10kd      | Blast_bacteriocinIII       | Helveticin J                  | 35784              | 10000-10980                             |
|                                    | AOI_2            | >10kd      | Blast_bacteriocinIII       | Enterolysin A                 | 853868             | 10000-10644                             |
|                                    | AOI_3            | >10kd      | Blast_bacteriocinIII       | Helveticin J                  | 1612611            | 10000-10959                             |
|                                    | AOI_4            | Unmodified | Blast_bacteriocinII        | Pediocin                      | 1660316            | 10000-10491                             |

39

40



41 Supplementary table S7. Phage sequences found in the *L. acidophilus* species

| Strain | Region Length | Completeness | Score | Total Proteins | Region Position | Most Common Phage                        | GC %   |
|--------|---------------|--------------|-------|----------------|-----------------|------------------------------------------|--------|
| LA1    | 26Kb          | incomplete   | 30    | 8              | 863940-890001   | PHAGE_Lactob_Lj965_NC_005355(2)          | 33.41% |
| NCFM   | 26Kb          | incomplete   | 20    | 9              | 863952-890013   | PHAGE_Lactob_Lj965                       | 33.41% |
| La-14  | 26Kb          | incomplete   | 20    | 9              | 863948-890009   | PHAGE_Lactob_prophage_Lj965_NC_005355(3) | 33.41% |
| FSI4   | 26Kb          | incomplete   | 30    | 12             | 864244-890305   | PHAGE_Lactob_Lj965_NC_005355(3)          | 33.41% |

42

43 Supplementary table S8. Detailed structure of the prophage ORFs associated to the *L. acidophilus* genomes. At most fifteen ORFs were detected  
 44 from ORF1(*attL*) to ORF15(*attR*). “=” means the same annotation between genomes and “?” means the different annotation between genomes at  
 45 each aligned ORF location.

|       | NCFM              |                                          |   | La-14             |                                          |   | FSI4              |                                |   | LA1               |                           |
|-------|-------------------|------------------------------------------|---|-------------------|------------------------------------------|---|-------------------|--------------------------------|---|-------------------|---------------------------|
|       | CDS_POSITION      | BLAST_HIT                                |   | CDS_POSITION      | BLAST_HIT                                |   | CDS_POSITION      | BLAST_HIT                      |   | CDS_POSITION      | BLAST_HIT                 |
| ORF1  | 863952..863969    | attL                                     | = | 863948..863965    | attL                                     | = | 864244..864261    | attL                           | = | 863940..863957    | attL                      |
| ORF2  |                   |                                          |   |                   |                                          |   | 868045..868878    | DegV domain-containing protein |   |                   |                           |
| ORF3  |                   |                                          |   |                   |                                          |   | c(868929..869504) | membrane protein               |   |                   |                           |
| ORF4  | c(869317..870294) | hypothetical protein FR483_N093R         | = | c(869313..870290) | hypothetical protein FR483_N093R         | ? | c(869609..870586) | choloylglycine hydrolase       |   |                   |                           |
| ORF5  | 870429..870517    | tRNA                                     | = | 870425..870513    | tRNA                                     | = | 870721..870809    | tRNA                           |   |                   |                           |
| ORF6  | c(870710..871660) | phage integrase                          | = | c(870706..871656) | phage integrase                          | = | c(870971..872083) | phage integrase                | = | c(870698..871648) | phage integrase           |
| ORF7  | c(871880..872080) | hypothetical protein                     | = | c(871876..872076) | hypothetical protein                     | = | c(872172..872372) | hypothetical protein           | = | c(871868..872068) | hypothetical protein      |
| ORF8  |                   |                                          |   |                   |                                          |   | c(872375..873028) | tail tape measure protein      | = | c(872071..872724) | tail tape measure protein |
| ORF9  | c(872083..872736) | putative superinfection immunity protein | = | c(872079..872732) | putative superinfection immunity protein | ? | c(873075..873548) | putative repressor             |   |                   |                           |
| ORF10 | c(873265..873603) | putative repressor                       | = | c(873261..873599) | putative repressor                       | = | c(873557..873895) | putative repressor             | = | c(873253..873591) | putative repressor        |
| ORF11 | 873767..873970    | putative cro repressor                   | = | 873763..873966    | putative cro repressor                   | = | 874059..874262    | putative cro repressor         | = | 873755..873958    | putative cro repressor    |
| ORF12 | 874230..875621    | transporter protein                      | ? | 874226..875617    | amino acid permease domain protein       | = | 874522..875913    | amino acid permease            | ? | 874218..875609    | hypothetical protein      |
| ORF13 | 875749..876705    | putative thymidylate synthase            | = | 875745..876701    | putative thymidylate synthase            | = | 876041..876997    | thymidylate synthase           | = | 875737..876693    | thymidylate synthase      |
| ORF14 | 876715..877218    | putative dihydrofolate reductase         | ? | 876711..877214    | gp125                                    | = | 877007..877510    | gp125                          | = | 876703..877206    | gp125                     |
| ORF15 | 890013..890030    | attR                                     | = | 890009..890026    | attR                                     | = | 890305..890322    | attR                           | = | 890001..890018    | attR                      |

46

47
